# Supplementary material
Source: PubMed Central journal article supplement (PMC3148018)
Supplement: NIHMS307941-supplement-Supplemental_data.pdf [file NIHMS307941-supplement-Supplemental_data.pdf]

## SUPPLEMENTAL FIGURES

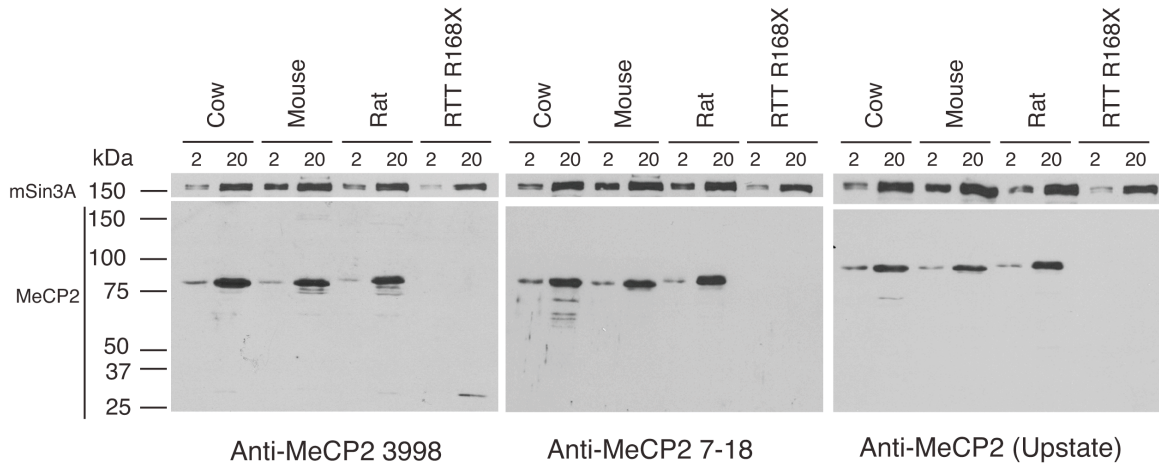

**Figure S1. Anti-MeCP2 antibodies react specifically with MeCP2 from multiple protein sources.** Antibodies against MeCP2 were used in western blotting of brain nuclear extracts from cow, mouse, and rat, and nuclear extracts from human lymphoblasts expressing the RTT R168X truncation to show their specificities. The Jones lab-generated anti-MeCP2 3998 (left panel) [17], and anti-MeCP2 7-18 (center panel) were compared with an anti-MeCP2 antibody purchased from Upstate Biotech (right panel). All three antibodies react with a single polypeptide migrating at ~80 kDa, consistent with MeCP2's known migration on SDS-PAGE, in brain nuclear extracts (2 or 20 µg/lane) from cow, mouse, and rat. These antibodies show no reactivity to any polypeptides in the human MeCP2 RTT R168X extracts by western blot analysis. These data confirm that the anti-MeCP2 7-17 antibody used in this study is specific for MeCP2. Load controls using an antibody for Sin3A [3] are shown above.

MeCP2 MonoQ flow-thru (QFT): Sequence coverage 41%

MVAGMLGLRKEK**SEDQDLQGLKEK**PLKFKKVKKDKKEDKEGKHEPLQPSAHH  
SAEPAEAGKAETSESSGSAPAVPEASASPKQRRSIIR**DRGPMYDDPTLPEGWTRK**  
LKQRKSGR**SAGKYDVYLN**PQGKA**FRSKVELIAYFEK**VGDTSLDPNDFDFTVTG  
**RGSPSRREQKPPKPKSPKAPGTGRGRGRPKGSGTGRP****KAASEGVQVKRVLEK**  
SPGKLLVK**MPFQASPGGK**GEGGGATTSAQVMVIK**RPGRKRKAEADPQAIPKKR**  
**GRKPGSVVAAAAEAKK**KAVKESSIR**SVQETVLP**IKKR**KTRET**VSIEVKEVVKPL  
**LVSTLGEK**SGKGLKTCKSPGRKSKESSPKGRSSSASSPPKKEHHHHHHHAESPKA  
PMPLPPPPPEPQSS**EDPISPEPQDLSSSICKEEKMPRAGSLESDGCPKEPAKTQP**  
MVAAAATTTTTTTTTTVAEKYK**HRGEGERKD****IVSSSM**PRPN**REEPVDSRTPVTER**  
**VS**

MeCP2 MonoQ bound 2 (QB2): Sequence coverage 23%

MVAGMLGLRKEK**SEDQDLQGLKEK**PLKFKKVKKDKKEDKEGKHEPLQPSAHH  
SAEPAEAGKAETSESSGSAPAVPEASASPKQRRSIIR**DRGPMYDDPTLPEGWTRK**  
LKQRKSGR**SAGKYDVYLN**PQGKA**FRSKVELIAYFEK**VGDTSLDPNDFDFTVTG  
**RGSPSRREQKPPKPKSPKAPGTGRGRGRPKGSGTGRP****KAASEGVQVKRVLEK**  
SPGKLLVK**MPFQASPGGK**GEGGGATTSAQVMVIK**RPGRKRKAEADPQAIPKKR**  
**GRKPGSVVAAAAEAKK**KAVKESSIR**SVQETVLP**IKKR**KTRET**VSIEVKEVVKPL  
**LVSTLGEK**SGKGLKTCKSPGRKSKESSPKGRSSSASSPPKKEHHHHHHHAESPKA  
PMPLPPPPPEPQSS**EDPISPEPQDLSSSICKEEKMPRAGSLESDGCPKEPAKTQP**  
MVAAAATTTTTTTTTTVAEKYK**HRGEGERKD****IVSSSM**PRPN**REEPVDSRTPVTER**  
**VS**

MeCP2 MonoQ bound 3 (QB3): Sequence coverage 33%

MVAGMLGLRKEK**SEDQDLQGLKEK**PLKFKKVKKDKKEDKEGKHEPLQPSAHH  
SAEPAEAGKAETSESSGSAPAVPEASASPKQRRSIIR**DRGPMYDDPTLPEGWTRK**  
LKQRKSGR**SAGKYDVYLN**PQGKA**FRSKVELIAYFEK**VGDTSLDPNDFDFTVTG  
**RGSPSRREQKPPKPKSPKAPGTGRGRGRPKGSGTGRP****KAASEGVQVKRVLEK**  
SPGKLLVK**MPFQASPGGK**GEGGGATTSAQVMVIK**RPGRKRKAEADPQAIPKKR**  
**GRKPGSVVAAAAEAKK**KAVKESSIR**SVQETVLP**IKKR**KTRET**VSIEVKEVVKPL  
**LVSTLGEK**SGKGLKTCKSPGRKSKESSPKGRSSSASSPPKKEHHHHHHHAESPKA  
PMPLPPPPPEPQSS**EDPISPEPQDLSSSICKEEKMPRAGSLESDGCPKEPAKTQP**  
MVAAAATTTTTTTTTTVAEKYK**HRGEGERKD****IVSSSM**PRPN**REEPVDSRTPVTER**  
**VS**

**Figure S2. Mass spectrometry MeCP2 peptide identifications.** MS identified peptides (in red) are shown in the predicted amino acid sequences for rat MeCP2 from the QF, QB2, and QB3 pools of MeCP2.

EIF2S1 [eukaryotic translation initiation factor 2, subunit 1] Sequence Coverage: 33%

MPGLSCRFYQHKFPEVEDVVMVNVRSIAEMGAYVSLLEYNNIEGMILLSSELSRR  
RIRSINKLIRIGRNECVVIRVDKEKGYIDLSKR~~RVSPEEAIKCEDKFTKSKTVYSI~~  
~~LRHVAEVLEYTKDEQLESLEFQRT~~AWVFDDKYKRPYGGAYDAFKH~~AVSDPSILDS~~  
~~LDLNEDEREVLINNINRRLTPQAVKIRADIEVACYGYEGIDAVKEALRAGLNCST~~  
ETMPIKINLIAPPRYVMTTTTLERTGLSVLNQAMAVIKEKIEEKRGVFNVMQMEP  
KVVTDTDETELARQLERLERENAEVDGDDDAEEMEAKAED

EIF2S2 [eukaryotic translation initiation factor 2, subunit 2] Sequence Coverage: 30%

MSGDEMIFDPTMSKKKKKKKPFMLDEEGDAQTEETQPSETKEVEPEPAEEKDV  
EADEEDSR~~KKDASDDLDDLNFNQKKKKKTKKIFDIDEAEEAIKDKVIESDAQE~~  
PAEPEDDLDIMLGNKKKKKNV~~KFPDEDEILEKDEALEDEDSKKDDGISFSNQTG~~  
PAWAGSERDYTYEELLNRVFNIM~~REKNPDMVAGEKRKRFVMKPPQVVRVGTCK~~  
TSFVNFTDICKLLHRQPKHLLAFLLAELGTSGSIDGNNQLVIKGRFQQ~~KQIENVLR~~  
~~RYIKEYVTCHTCRSPDTILQKDTRL~~YFLQCETCHSRCSVASIK~~TGFQAVTGKRAQ~~  
LRAKAN

EIF2S3 [eukaryotic translation initiation factor 2, subunit 3] Sequence Coverage: 37%

MAGGEAGVTLGQPHLSRQDLATLDVTKLTPLSHEVISRQATINIGTIGHVAHGKS  
TVVKAISGVHTVRFKNELERNITIKLGYANAKIYKLDDPSCPRPECYRSCGSSTPD  
EFPTDIPGT~~KGNFKLVRHVSFVDCPGHDILMATMLNGAAVMDAALLIAGNESC~~  
PQPQTSEHLAAIEIMKLKHLILQNKIDLVKESQAKEQYEQILAFVQGTVAEGAPII  
PISAQLKYNIEVVCEYIV~~KKIPVPRDFTSEPRL~~LIVIRSF~~VNKP~~GCEVDDLKGGVA  
GGSILKGV~~LKVGQIEVVRPGIVSKDSEGKLMCKPIFSKIVSLFAEHNDLQYAAPGG~~  
~~LIGVGT~~KIDPTLCRADRMVGV~~LVGALPEIFTELEISYFLLRRL~~LGVRTEGDKK  
AAKVQKLSKNEVLMVNI~~SLSTGGRVSAVKADLGKIVLTNPVCTEVGEKIALSR~~  
RVEKHW~~RLIGWGQIRRGVTIKPTVDDD~~

Mecp2 [Methyl-CpG-binding protein 2] Sequence Coverage: 23%

MVAGMLGLRKEKSEDQDLQGLKEKPLKFKKVKKDKKEDKEGKHEPLQPSAHH  
SAEPAEAGKAETSESSGSAPAVPEASASPKQRRSIIRDRGPMYDDPTLPEGWTRK  
LKQRKSG~~RSAGKYDVYLINPQGKAFRSKVELIAYFEKVGDTSLDPNDFDFTVTG~~  
~~RGSPSRREQPPKPKSPKAPGTGRGRGRPKGSGTGRP~~KAAASEGVQV~~KRVLEK~~  
SPGKLLVKMPFQASPGGKGEGGGATTSAQVMVIKRPGR~~KRAEADPQAIPKRR~~  
~~GRKPGSVVAAAAEAKK~~KAVKESSIRSVQETVLPIK~~KRKTRET~~VSIEVKEV~~VKPL~~  
~~LVSTLGEKS~~GKGLKTCKSPGRKSKESSPKGRSSSASSPPKKEHHHHHHHAESPKA  
PMPLPPPPPPPEPQSSDPISPEPQDLSSICKEEKMPRAGSLES~~DGCPKEPAKTQP~~  
MVAAAATTTTTTTTTTVAEKYKHRGEGEKDIVSSSM~~PRPNREEPVDS~~RTPV~~TER~~  
VS

PRPF3 [PRP3 pre-mRNA processing factor 3 homolog] Sequence Coverage: 9%

MALSKRELDELKPWIEKTVKRVLGFSEPTVVTAALNCVKGMDKKKAADHLKP  
FLDDSTLRFVDKLFEA VEEGRSSRHSSSSDRSRKRELKEVFGDDSEISKESGK  
KRRIPRFEEVEEPEVIPGPPSESPGMLTKLQIKQMMEAATRQIEERKKQLSFISPP  
APQPKTPSSSQPERLPIGNTIQPSQAATFMNDAIEKARKAAELQARIQAQLALPG  
LIGNANMVGLANLHAMGIAPPKVELKDQTKPTPLILDEQGRTVDATGKEVELTH  
RMPTLKANIRAVKREQFKQQLKEKPSSEDMESNTFFDPRVSIAPSQRQRRTFKFHD  
KGKFEKIAQRLRTKAQLEKLQAEISQAARKTGIHTSTRLLALIAPKKELKEGDIPEIE  
WWDSYIIPNGFDLTEENPKREDYFGITNLVEHPAQLNPPVDNDTPVTLGVYLTKK  
EQKKLRRQTRREAQKELQEKVRLGLTPPEPKVRISNLMRVLGTEAVQDPTKVE  
AHVRAQMAKRQKAHEEANAARKLTAEQRKVKKVKKLKEDISQGVHISVYRVR  
NLSNPAKKFKIEANAGQLYLTGVVVLHKDVNVVVVEGGPKAQRKFKRLMLHRI  
KWDEQTSNTKGDDEESDEEAVKKTNKCVLVWEGTAKDRSFGEMKFKQCPT  
NMAREHFKKHGAEHYWDLALSSESVLESTD

ABCF1 [PREDICTED: similar to ATP-binding cassette sub-family F member 1 (ATP-binding cassette 50)]  
Sequence Coverage: 32%

MPKGPKQQPPEPEWIGDGGTSPADKVVKKGKKDKTKKKTFFEELAVEDKQAG  
EEKQLQKEKEQQQQQQQKRRDTRKGRKKDVDDDDGDERVLMERLKQLS  
VPASDEEDEVPPVPRGRKAKGGNVFEALIQDESEEEKEEEEEKPVLKPAKPEK  
NRINKAVAEPPGLRNKKGKEEKSKGKAKNKPSATDSEGEDDEDMTKEKEPPRP  
GKDKDKGAEQGSSEEEKEEKEGEVKANDPYAHLKKEKLLKQMDYERQVE  
SLKAANAENDFSVSAEVSSRQAMLENASDIKLEKFSISAHGKELFVNADLYIV  
AGRRYGLVGPNGKGTLLKHIANRALSIPPNDVLLCEQEVVADETPAVQAVLR  
ADTKRLRLLEEEKRLQGQLEQGDDTAAEKLEKVEELRATGAAA AEAKARRIL  
AGLGFDPQMQRPTQKFSGGWRMRVSLARALFMEPTLLMLDEPTNHLDLNAVI  
WLNNYLQGWKTLIVSHDQGLDDVCTDIHLDTQRLHYRGNMFTFKMYQ  
QKQKELLKQYEQEKLLKELKAGGKSTKQAEKQTKVLRTRKQKCRRNQDE  
ESQDPPELLKRPREYTVRFTFPDPPPLSPPVLGLHGVTFGYEGQKPLFKNLDFGID  
MDSRICIVGPNVGKSTLLLLLTGKLTPTNGEMRKNHRLKIGFFNQYAEQLHM  
EETPTEYLQRGFNLPYQDARKCLGRFGLESHAHTIQICKLSGGQKARVFAELAC  
REPDVLILDEPTNNDIESIDALGEAINEYKGAVIVVSHDARLITETNCQLWVVEE  
QSVSQIDGDFDDYKREVLALGEVMVNRPRD

SDCCA1 [similar to serologically defined colon cancer antigen 1]  
Sequence Coverage: 3%

MKTRFSTVDLRAVLAELNANLLGMRVNNVYDVDNKTYLIRLQKPDFKATLLE  
SGIRIYTTEFEWPKNMMPSFAMKCRKHLKSRRLLVSAKQLGVDRIVDFQFGSDE  
AAYHLIIELYDRGNIVLTDYELILNILRFRTDEADDVKFAVRERYPIDHARRAEP  
LLTLERLTEVIARAPRGELLKRVLNLLLPYGPALIEHCLIENGFSGNVKVDEKLES  
KDIEKILVCVQRAEDYLEKTANFNGKGYIIQKREVKPSLDANKPAEDILMYEEFH  
PFLFSQHLQCPYIEFESFDKEKQALKKLDNVXKDHENRLEALQQAQEIDKLGEL

IEMNLQIVDRAIQVVRSALANQIDWTEIGVIVKEAQAQGDHVASAIKELKLQTNH  
ITMLLRNPYLLSEEEDGDGDGSIENSDAEAPKGGKKAKEQAAAEASEGQAAACR  
CGPQPVSLCQCQKVLXSXEVCXKTTENCRCXEGIQISREENKANLKRSTNSYF  
YPKSKESVLVXEISVVYXFRELSHYRWSRSATEXDYCEKILNTRRHL CACXSSWS  
YQLCNXESNRRSHPSDFDXSRHNGTLLQRGLGCPCYHECLVGAPSSGIXNSTDR  
RVLNNWKLHDKRKKKEFPSSFIPNDGVXLPFXGRXVLCLETSRXTKRQSAGXRHE  
NIDKLHKXTHVRRNGTARRGRQQXRRDRGVMWNHGRSGTQDSGXSRGHCCSQ  
WKRGTTELXRWRSHQNSHERXRAHWXGEGRGGRISXHHHXLVSSVPKAPTETD  
SKRRIFXFKXQXITEPKTFVSQGEKRNEKEKAPMXLRGFRSDRRKGQRKRKCCA  
QXSXPEHKQKCGSWTANEKRPEEXNEKNEGKIQRPGXXRSXTYYEIVGICRFKQ  
RRKGEERKERKNKRXTREKKPTETQRWTAGFRCCXRNPVPSGVDSXLTRLCCG  
XATXXQGRTXSGSAGKXGKSIXLFDRAATTSXRCTNVCYSNMCSLHHHDKLXIQS  
ETYSWSSEKGGKCKDSLEQFHALQRSNSKRKRLIPKCEGHRFTKKHSRESESVCP  
QSSARKKKI

**Figure S3. Mass spectrometry identifications of MeCP2 co-purifying peptides.** MS identified peptides (in red) for the MeCP2 co-purifying polypeptides from the QB2 pool of MeCP2.

**Table S1: PCR and RT-PCR oligonucleotide primers**

| Primer | Plasmid Construct     | Sequence (5'-3')                  |
|--------|-----------------------|-----------------------------------|
| 1      | pGEM ratAbcf1         | ATGCCGAAGGGTCCCAAGCAGC            |
| 2      | pGEM ratAbcf1         | TCAATCCCGAGGTTCGGTTGAC            |
| 3      | pGEM ratEif2s1        | ATGCCGGGTCTAAGTTGTAGATTTTATCAACAC |
| 4      | pGEM ratEif2s1        | TTAATCTTCAGCTTTGGCTTCCATTTCTTCTGC |
| 5      | pGEM ratEif2s2        | ATGTCCGGGGACGAGATGATTTTTGATCCTAC  |
| 6      | pGEM ratEif2s2        | TTAGTTAGCTTTGGCACGGAGCTG          |
| 7      | pGEM ratEif2s3        | ATGGCTGGGGGTGAGGCTG               |
| 8      | pGEM ratEif2s3        | TCAGTCATCATCTACAGTCGGCTTAATG      |
| 9      | pGEM ratMeCP2         | ATGGTAGCTGGGATGTTAGGGC            |
| 10     | pGEM ratMeCP2         | TCAGCTAACTCTCTCGGTCACG            |
| 11     | pGEM ratPrpf3         | ATGGCACTGTCTAAGCGGGAAGTGGATG      |
| 12     | pGEM ratPrpf3         | CTACAGAGAACATGGCGCGTGA            |
| 13     | pGEM ratSdccag1       | ATGAAGACCCGCTTCAGCACTGTTGAC       |
| 14     | pGEM ratSdccag1       | CTATTTTCTTTTACGTGCAGAAGATTGGG     |
| 15     | pGEM human Prpf3      | ATGGCACTGTCAAAGAGGGAGC            |
| 16     | pGEM human Prpf3      | TCAATCAGTGGACTCTAAC               |
| 17     | pCDNA3.1 ratAbcf1     | GCGGCCGCATGCCGAAGGGTCC            |
| 18     | pCDNA3.1 ratAbcf1     | CGCTCGAGTCAATCCCGAGGTCCG          |
| 19     | pCDNA3.1 ratEif2s1    | GCGGCCGCATGCCGGGTCTAAG            |
| 20     | pCDNA3.1 ratEif2s1    | CGCTCGAGTTAATCTTCAGCTTTGGCTTC     |
| 21     | pCDNA3.1 ratEif2s2    | GCGGCCGCATGTCCGGGGAC              |
| 22     | pCDNA3.1 ratEif2s2    | CGCTCGAGTTAGTTAGCTTTGGCACG        |
| 23     | pCDNA3.1 ratEif2s3    | GCGGCCGCATGGCTGGGGGTG             |
| 24     | pCDNA3.1 ratEif2s3    | CGCTCGAGTCAGTCATCATCTACAGTCG      |
| 25     | pCDNA3.1 ratMeCP2     | GCGGCCGCATGGTAGCTGGGATG           |
| 26     | pCDNA3.1 ratMeCP2     | CGCTCGAGTCAGCTAACTCTCTCGGTC       |
| 27     | pCDNA3.1HA humanMeCP2 | GCGGCCGCATGGTAGCTGGGATG           |
| 28     | pCNA3.1HA humanMeCP2  | CGCTCGAGTCAGCTAACTCTCTCGGTC       |
| 29     | pCDNA3.1 ratPrpf3     | GCGGCCGCATGGCACTGTCTAAGC          |
| 30     | pCDNA3.1 ratPrpf3     | CGCTCGAGTCACGCGCCATGTTCTC         |
| 31     | pCDNA3.1 ratSdccag1   | GCGGCCGCATGAAGAGCCGCT             |
| 32     | pCDNA3.1 ratSdccag1   | CGCTCGAGCTATTTCTTTTACGTTTTCAGAAG  |
| 33     | pCDNA3.1 humanPrpf3   | AGAATTCATGGCACTGTCAAAGAG          |
| 34     | pCDNA3.1 humanPrpf3   | CTCGAGTCAATCAGTGGACTCTAAC         |
| 35     | pGEX5X ratPrpf3       | AGAATTCATGGCACTGTCTAAGC           |
| 36     | pGEX5X ratPrpf3       | CTCGAGTCACGCGCCATGTTCTC           |
| 37     | pGEX5X MeCP2 d1       | AGAATTCGCTCCCCCAAACAG             |
| 38     | pGEX5X MeCP2 d1       | CTCGAGTCAGCTAACTCTCTCGG           |
| 39     | pGEX5X MeCP2 d2       | AGAATTC AAGCAAAGGAAATCTGGC        |
| 40     | pGEX5X MeCP2 d2       | CTCGAGTCAGCTAACTCTCTCGG           |
| 41     | pGEX5X MeCP2 d3       | AGAATTCGGCACCACGAGACC             |
| 42     | pGEX5X MeCP2 d3       | CTCGAGTCAGCTAACTCTCTCGG           |
| 43     | pGEX5X MeCP2 d4       | AGAATTCACGGTCAGCATCGAG            |
| 44     | pGEX5X MeCP2 d4       | CTCGAGTCAGCTAACTCTCTCGG           |

|    |                          |                               |
|----|--------------------------|-------------------------------|
| 45 | pGEX5X MeCP2 d5          | AGAATTCATGGTAGCTGGGATGTTAG    |
| 46 | pGEX5X MeCP2 d5          | CTCGAGGGTCTTGCGCTTCTTG        |
| 47 | pGEX5X MeCP2 d6          | AGAATTCGGCACCACGAGACC         |
| 48 | pGEX5X MeCP2 d6          | CTCGAGACCGAGGGTGGACAC         |
| 49 | RT-PCR mouseFRG1 5'      | AATTGCCCTGAAGTCTGGCTATGG      |
| 50 | RT-PCR mouseFRG1 3'      | CTTCAATTTGGCTCTCCTGTCCAG      |
| 51 | RT-PCR mouseCDK10 5'     | GGCCAGGGATACCCAGACAG          |
| 52 | RT-PCR mouseCDK10 3'     | CCTCCGAGAAGGGTGTGGC           |
| 53 | RT-PCR mouseCasc3 5'     | CTACAGTGAAGAGGAGAATTCCAAGGTG  |
| 54 | RT-PCR mouseCasc3 3'     | GATCCTCATCGTCATCCAAGTGC       |
| 55 | pGEX5X MeCP2 S49X        | AGAATTCGCCTCCCCCAAACAG        |
| 56 | pGEX5X MeCP2 S49X        | ACTCGAGTCATGGCTGCACGGGC       |
| 57 | pGEX5X MeCP2 S68X        | AGAATTCGCCTCCCCCAAACAG        |
| 58 | pGEX5X MeCP2 S68X        | ACTCGAGTCACCCTTCTGATGTCTC     |
| 59 | pGEX5X MeCP2 W104X       | AGAATTCGCCTCCCCCAAACAG        |
| 60 | pGEX5X MeCP2 W104X       | ACTCGAGTCAGCCTTCAGGCAGG       |
| 61 | pGEX5X MeCP2 Y141X       | AGAATTCGCCTCCCCCAAACAG        |
| 62 | pGEX5X MeCP2 Y141X       | ACTCGAGTCACGCAATCAACTCC       |
| 63 | pGEX5X MeCP2 R168X       | AGAATTCGCCTCCCCCAAACAG        |
| 64 | pGEX5X MeCP2 R168X       | ACTCGAGTCATCATCTCGCCGGGAGGG   |
| 65 | pGEX5X MeCP2 S204X       | AGAATTCGCCTCCCCCAAACAG        |
| 66 | pGEX5X MeCP2 S204X       | CTCGAGTCACGTGGCCGCCTTG        |
| 67 | pGEX5X MeCP2 R106W       | AGAATTCATGGTAGCTGGGATGTTAGGG  |
| 68 | pGEX5X MeCP2 R106W       | CTCGAGTCAGCTAACTCTCTCGGTC     |
| 69 | pGEX5X MeCP2 F155S       | AGAATTCATGGTAGCTGGGATGTTAGGG  |
| 70 | pGEX5X MeCP2 F155S       | CTCGAGTCAGCTAACTCTCTCGGTC     |
| 71 | pGEX5X MeCP2 R294X       | AGAATTCATGGTAGCTGGGATGTTAGGG  |
| 72 | pGEX5X MeCP2 R294X       | CTCGAGTCATCGGATAGAAGACTCCTTC  |
| 73 | pGEX5X MeCP2 F155S/R294X | AGAATTCATGGTAGCTGGGATGTTAGGG  |
| 74 | pGEX5X MeCP2 F155S/R294X | CTCGAGTCATCGGATAGAAGACTCCTTC  |
| 75 | pGEX5X MeCP2 H370X       | AGAATTCATGGTAGCTGGGATGTTAGGG  |
| 76 | pGEX5X MeCP2 H370X       | CTCGAGTCAGTGATGGTGGTGGTGC     |
| 77 | pGEX5X MeCP2 E397X       | AGAATTCATGGTAGCTGGGATGTTAGGG  |
| 78 | pGEX5X MeCP2 E397X       | CTCGAGTCACTCGGAGCTCTCGG       |
| 79 | pGEX5X MeCP2 R453X       | AGAATTCATGGTAGCTGGGATGTTAGGG  |
| 80 | pGEX5X MeCP2 R453X       | CTCGAGTCATCGGTGTTTGTACTTTTCTG |

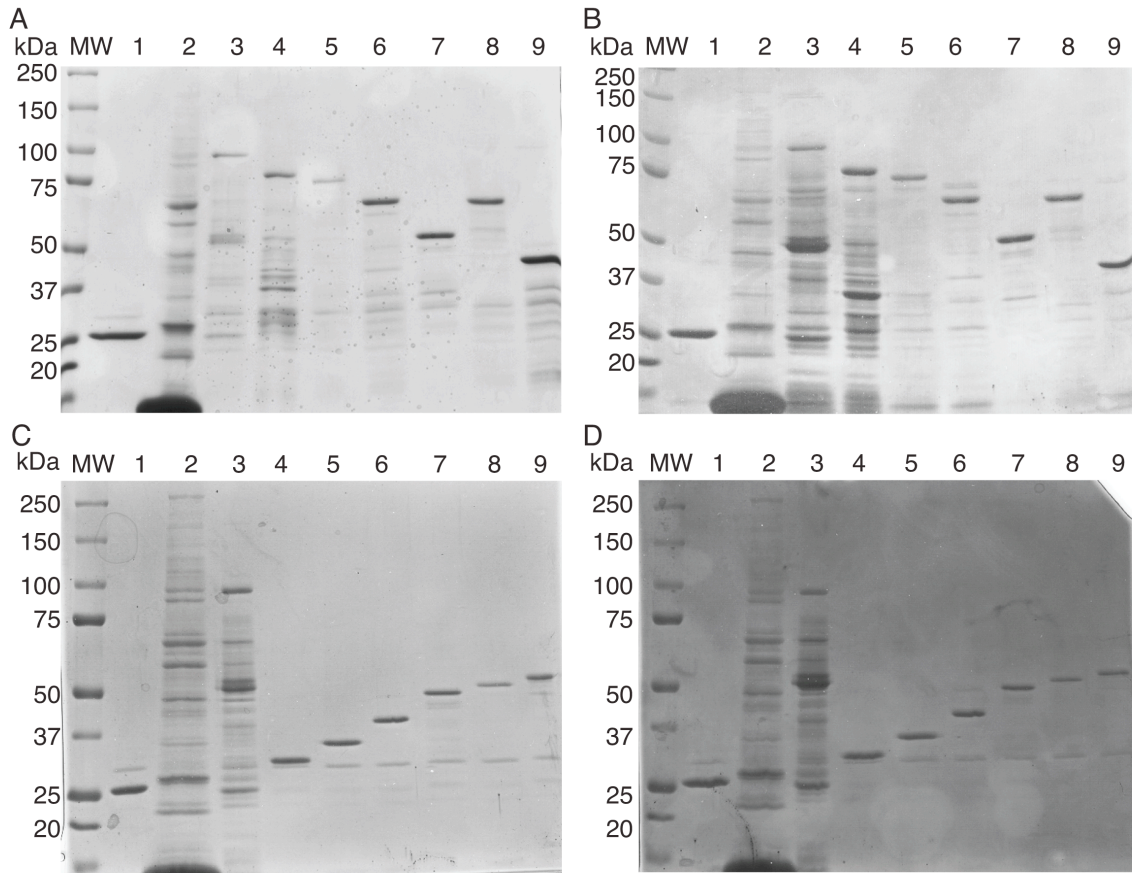

**Figure S4. GST input control gels.** Coomassie brilliant blue stained SDS-PAGE gels from GST pull-down experiments show equivalent levels of GST-fusion proteins in each pull-down reaction. A) GST-fusion proteins from Figure 4C, Prpf3. B) GST-fusion proteins from Figure 4C, Sdccag1. C) GST-fusion proteins from Figure 6A, Prpf3. D) GST-fusion proteins from Figure 6A, Sdccag1.



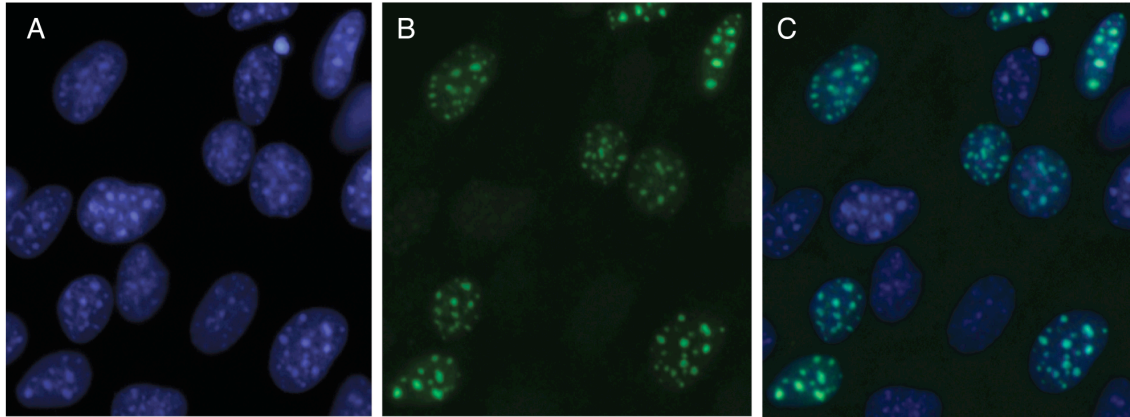

**Figure S5. Characterization of HA-MeCP2 expressing HT22 cells.** HT22 hippocampal neuronal cells stably transfected with HA-MeCP2, visualized by A) DAPI staining and B) indirect immunofluorescence for HA-MeCP2 with C) images merged, show HA-MeCP2 localizes to heterochromatic foci.
